# Supplementary material for: Targeted delivery of CRISPR-Cas9 ribonucleoprotein into arthropod ovaries for heritable germline gene editing
Source: PubMed Central journal article supplement (PMC6070532; doi:10.1038/s41467-018-05425-9), 2018-08-01
Supplement: 41467_2018_5425_MOESM1_ESM.pdf [file 41467_2018_5425_MOESM1_ESM.pdf]

**Chaverra-Rodriguez et al. 2018.** Targeted delivery of CRISPR-Cas9 ribonucleoprotein into arthropod ovaries for heritable germline gene editing

## Supplementary Figures

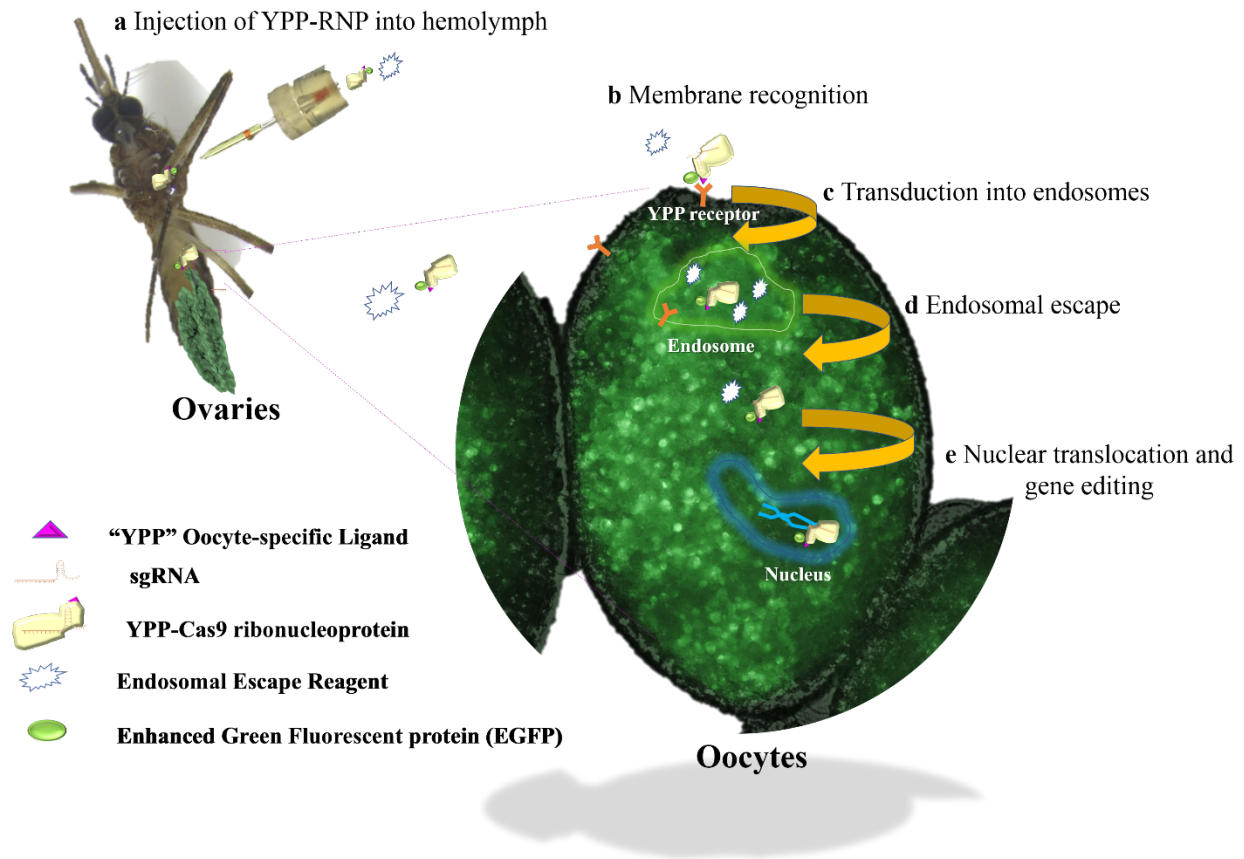

**Supplementary Figure 1. Rationale for Receptor-Mediated Ovary Transduction of Cargo (ReMOT Control).** After a female mosquito takes a blood meal, yolk protein receptors are expressed on the membrane of the developing oocytes in the ovaries. **a** A capillary needle is used to inject into the female’s hemolymph a solution containing a Yolk Protein Precursor (YPP) fused to Cas9 ribonucleoprotein (YPP-Cas9 RNP) mixed with an endosomal escape reagent (EER). **b** The YPP ligand domain of the fusion protein is recognized by receptors in the oocyte membrane. **c** The YPP-Cas9 is internalized into endosomes where it is sorted to yolk granules and lysosomes. **d** The addition of membrane destabilizing reagents allow YPP-Cas9 to escape the endosome and reach the cytoplasm, the nuclear localization signal present in Cas9 directs the enzyme to the nucleus. **e** The molecules that reach the nucleus bind the DNA and create double strand breaks in the oocyte’s chromosome. EGFP may be fused to the YPP-RNP for tracking purposes.

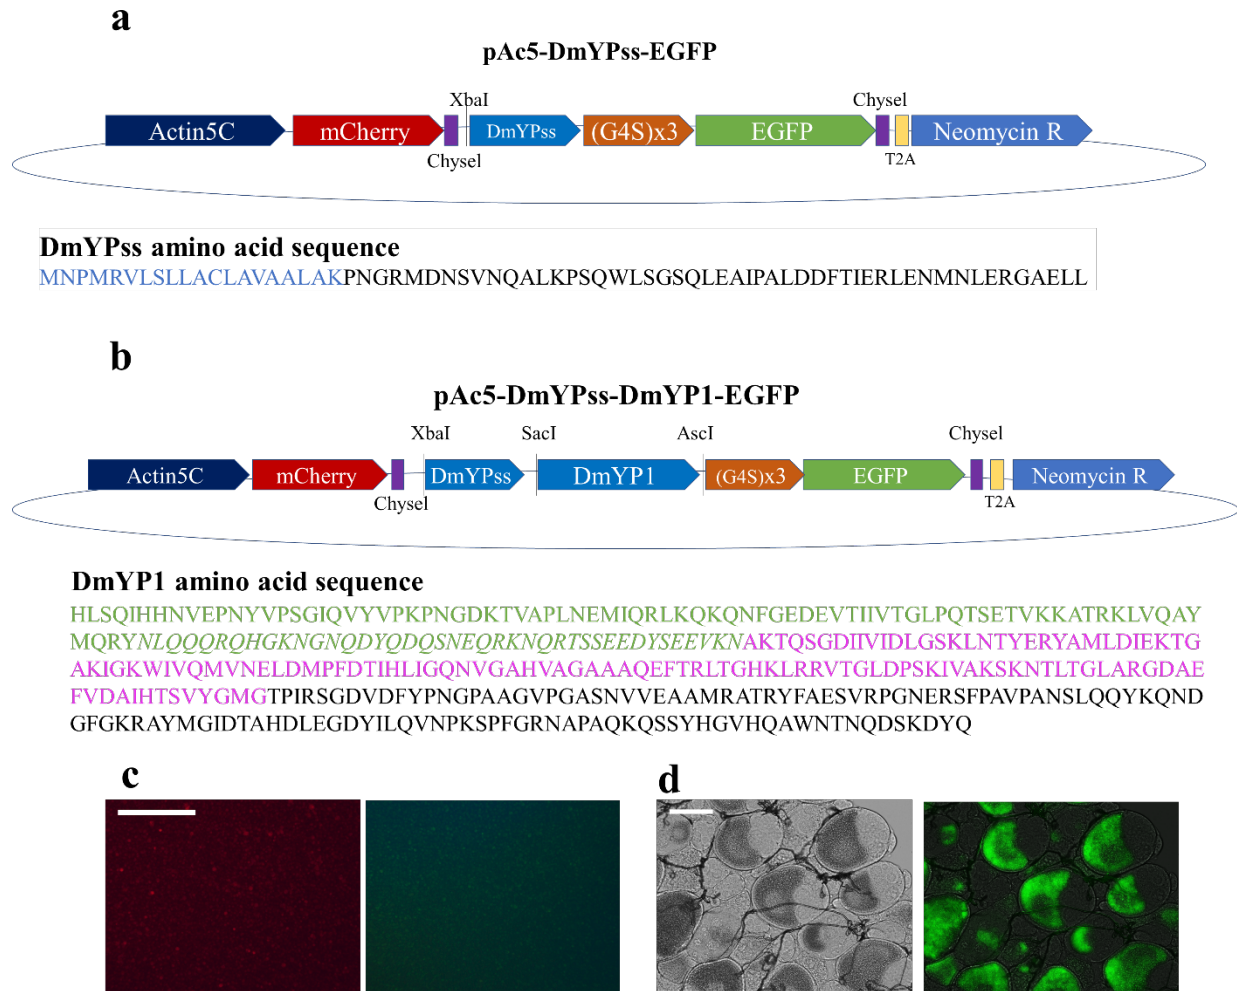

**Supplementary Figure 2. Plasmids maps and protein expression in *D. melanogaster* S2 cells.**

**a** Plasmid map of pAc5-DmYPss-EGFP. The amino acid sequence for DmYPss is showed below the map, the first 20 amino acids (in blue) represent the signal peptide used for secretion of any downstream protein. **b** Plasmid map of pAc5-DmYPss-DmYP1-EGFP. The amino acid sequence for the protein is showed below the plasmid map highlighting in different colors three portions that were further tested for EGFP transduction. Green is portion 2 (P2, italicized text represents the sequence for P2C), magenta is portion 3 (P3) and black is portion 4 (P4). The whole sequence for DmYP1 includes DmYPss+P2+P3+P4. **c** Expression of mCherry (left) and DmYP1-EGFP (right) in S2 cells transfected with the plasmid pAc5-DmYPss-DmYP1-EGFP. Scale bar = 50  $\mu$ m. **d** Transduction of S2-expressed DmYP1-EGFP into the oocytes of *An. gambiae* (N = 20, also see supplementary Table 1). Scale bar = 100 $\mu$ m.

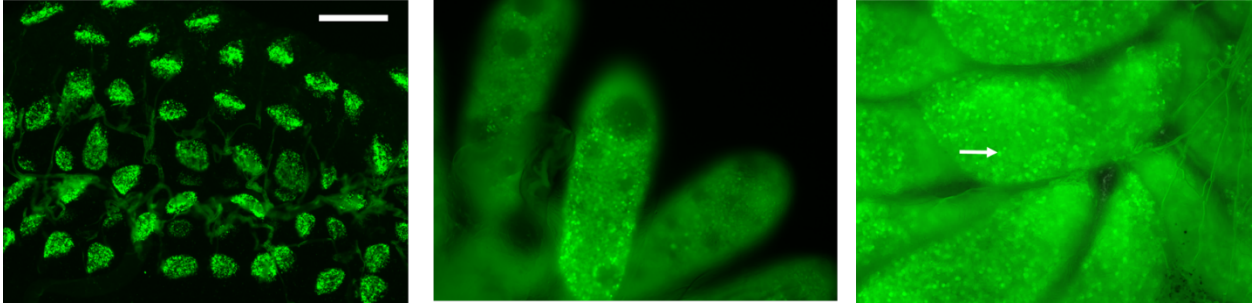

**Supplementary Figure 3. Characterization of DmYP1-mediated transduction of EGFP.** Transduced EGFP is observed in yolk granules throughout oocyte development. Left. 24h PBF. Center 36h PBF. Right 48h PBF (white arrow indicates yolk granules). Scale bar = 100  $\mu$ m.

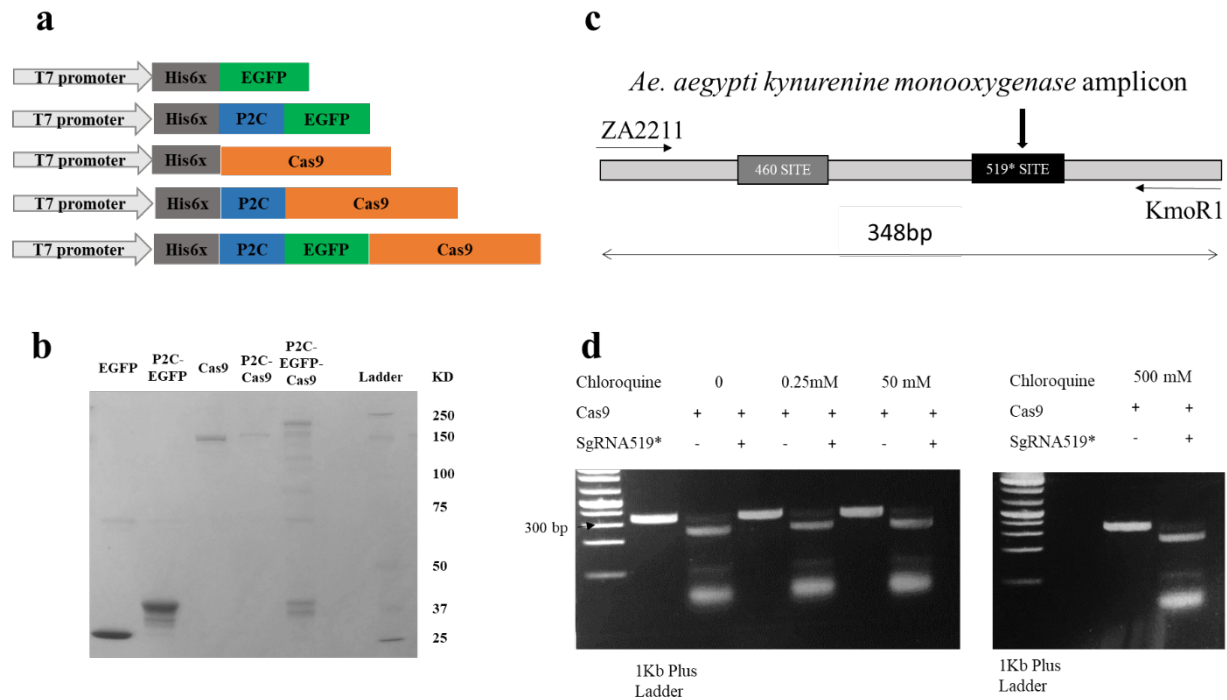

**Supplementary Figure 4.** Verification of *E. coli* expression and activity for recombinant proteins used in this study. **a** Construct maps for different proteins. **b** Coomassie-stained gel of *E. coli*-expressed EGFP, P2C-EGFP, Cas9 and P2C-EGFP-Cas9. **c** Schematic showing cut site for a 348bp amplicon of the *kmo* gene used for *in vitro* Cas9 cleavage assays. **d** Agarose gel (1%) showing the DNA fragments resulted from the *kmo* amplicon cleavage assay using P2C-EGFP-Cas9 and sgRNA519\* mixed with chloroquine. In the absence of sgRNA the amplicon is not cleaved. (+) indicates that the component is present (-) indicates that the component was not added to the mix.

## Supplementary tables

**Supplementary Table 1.** Effects of time of injection on delivery efficiency.

| Time of injection<br>(hours PBF)/<br>Replicate* # | ♀<br>Injected<br>(N) | ♀<br>showing<br>EGFP in<br>follicles<br>(N) | ♀<br>showing<br>EGFP<br>in<br>follicles<br>(%) | Follicles<br>observed**<br>(N) | Follicles<br>with<br>EGFP<br>(N) | % Follicles<br>with EGFP<br>(Efficiency)*** |
|---------------------------------------------------|----------------------|---------------------------------------------|------------------------------------------------|--------------------------------|----------------------------------|---------------------------------------------|
| 12h/1                                             | 20                   | 17                                          | 85%                                            | 243                            | 243                              | 100%                                        |
| 12h/2                                             | 20                   | 19                                          | 95%                                            | 383                            | 381                              | 98%                                         |
| Total                                             | 40                   | 36                                          | 90%                                            | 626                            | 624                              | 99.7%                                       |
| 24h/1                                             | 20                   | 18                                          | 90%                                            | 250                            | 245                              | 98%                                         |
| 24h/2                                             | 20                   | 17                                          | 85%                                            | 200                            | 197                              | 99%                                         |
| Total                                             | 40                   | 35                                          | 88%                                            | 450                            | 442                              | 98.2%                                       |

\*The experiment was replicated twice for each time of injection. No statistical analysis was performed on this data.

\*\*A subsample of females (N = 5-8) showing EGFP in the ovaries were dissected, 50 follicles were randomly chosen and scored for EGFP detection under microscopy.

\*\*\*Efficiency was similar in further trials, we noticed that a female that showed EGFP in its ovaries presented high rates of follicle transduction.

**Supplementary Table 2.** Validation of *in vivo* activity for fusion P2C-Cas9/sgRNA460 RNPs by standard embryo injection.

| Protein               | [Protein]<br>(ng $\mu\text{L}^{-1}$ ) | [sgRNA]<br>(ng $\mu\text{L}^{-1}$ ) | Eggs<br>injected<br>(N) | G <sub>0</sub><br>Larvae<br>hatched<br>(N) | %<br>hatching | G <sub>0</sub><br>Mosaic<br>(N) | G <sub>0</sub><br>white<br>(N) | #KO/<br>injection<br>EEF (%) | #KO/<br>Surviving<br>G <sub>0</sub><br>GEF (%) |
|-----------------------|---------------------------------------|-------------------------------------|-------------------------|--------------------------------------------|---------------|---------------------------------|--------------------------------|------------------------------|------------------------------------------------|
| Cas9                  | 300                                   | 100                                 | 48                      | 23                                         | 48%           | 1                               | 0                              | 2.1%                         | 4%                                             |
|                       |                                       |                                     | 48                      | 21                                         | 44%           | 1                               | 0                              | 2.1%                         | 5%                                             |
|                       |                                       |                                     | 73                      | 23                                         | 32%           | 7                               | 0                              | 9.6%                         | 30%                                            |
|                       |                                       | Total                               | 169                     | 67                                         | 39.64%        | 9                               | 0                              | 5%                           | 13%                                            |
| Cas9-P2C              | 300                                   | 100                                 | 101                     | 34                                         | 34%           | 0                               | 0                              | 0                            | 0                                              |
|                       |                                       |                                     | 74                      | 21                                         | 28%           | 0                               | 0                              | 0                            | 0                                              |
|                       | 300                                   | 200                                 | 224                     | 47                                         | 21%           | 19                              | 2                              | 9.4%                         | 45%                                            |
|                       |                                       |                                     | Total                   | 399                                        | 102           | 25.5%                           | 19                             | 2                            | 5%                                             |
| Cas9-<br>P2C-<br>EGFP | 300                                   | 250                                 | 137                     | 53                                         | 39%           | 0                               | 0                              | 0                            | 0                                              |
|                       | 300                                   | 200                                 | 100                     | 13                                         | 13%           | 1                               | 1                              | 2.0%                         | 15%                                            |
|                       | Total                                 |                                     | 237                     | 662                                        | 28%           | 1                               | 1                              | 1%                           | 3%                                             |

**Supplementary Table 3.** Optimization of the injection conditions required for gene editing of the maternal chromosome with P2C-EGFP-Cas9/sgRNA519\* RNP without EERs.

| [Protein]<br>ng $\mu\text{L}^{-1}$ | [sgRNA]<br>ng $\mu\text{L}^{-1}$ | Time<br>(h) | EER         | N  | N<br>Surviving | N<br>laying* | N<br>eggs | N<br>larvae | N<br>Females<br>laying<br>KO** | N<br>Knockouts |
|------------------------------------|----------------------------------|-------------|-------------|----|----------------|--------------|-----------|-------------|--------------------------------|----------------|
| 2700                               | 1750                             | 24          | <b>NONE</b> | 20 | 11             | 1            | 30        | 2           | 0                              | 0              |
| 1867                               | 1853                             | 24          | <b>NONE</b> | 12 | 10             | 7            | 235       | 231         | 0                              | 0              |
| 1867                               | 1853                             | 24          | <b>NONE</b> | 17 | 9              | 3            | 68        | 18          | 0                              | 0              |
| 1867                               | 1853                             | 24          | <b>NONE</b> | 17 | 15             | 9            | 454       | 210         | 0                              | 0              |
| 1867                               | 1853                             | 48          | <b>NONE</b> | 10 | 6              | 3            | 128       | 73          | 0                              | 0              |
| 3337                               | 1167                             | 30          | <b>NONE</b> | 9  | 7              | <u>6</u>     | 166       | 75          | 0                              | 0              |

\*After 24h of injection, surviving females were allowed to lay eggs individually (underlined numbers) or in a single group of survivors (no text formatting). The number of females laying eggs was determined directly from isofemales, or estimated as the number of females alive when eggs first appeared in the group cages.

\*\*The number of females laying knockouts (KO) was 1 when only one KO was produced from group of females or was determined directly from isofemales



**Supplementary Table 4.** Optimization of injection conditions required for gene editing of the maternal chromosome with P2C-EGFP-Cas9/sgRNA519 RNP and Chloroquine.

| [RNP] ng<br>$\mu\text{L}^{-1}$ | [sgRNA]<br>ng $\mu\text{L}^{-1}$ | Time<br>(h) | EER              | N  | N<br>Surviving | N<br>laying* | N<br>eggs | N<br>larvae | N<br>Females<br>laying<br>KO** | N<br>Mosaic | N<br>White |
|--------------------------------|----------------------------------|-------------|------------------|----|----------------|--------------|-----------|-------------|--------------------------------|-------------|------------|
| 3337                           | 1167                             | 30          | Chlq-0.25mM      | 15 | 8              | <u>6</u>     | 126       | 72          | 0                              | 0           | 0          |
| 3337                           | 1167                             | 30          | Chlq-0.5mM       | 15 | 10             | <u>6</u>     | 123       | 79          | 1                              | 0           | 1          |
| 3337                           | 1167                             | 30          | Chlq-1mM         | 15 | 9              | <u>5</u>     | 63        | 46          | 0                              | 0           | 0          |
| 3882                           | 1342                             | 28          | Chlq-0.5mM       | 39 | 17             | <u>17</u>    | 633       | 375         | 2                              | 0           | 2          |
| 3375                           | <b>703</b>                       | 28          | Chlq-0.5mM       | 30 | 25             | <u>17</u>    | 405       | 137         | 0                              | 0           | 0          |
| 3375                           | <b>703</b>                       | 28          | Chlq-0.5mM       | 25 | 20             | <u>20</u>    | 573       | 330         | 0                              | 0           | 0          |
| 3375                           | <b>703</b>                       | 28          | Chlq-1mM         | 30 | 25             | <u>20</u>    | 567       | 365         | 0                              | 0           | 0          |
| 3375                           | <b>703</b>                       | 28          | Chlq-10mM        | 30 | 27             | <u>23</u>    | 532       | 351         | 0                              | 0           | 0          |
| 3375                           | <b>703</b>                       | 28          | Chlq-0.5mM       | 20 | 20             | <u>18</u>    | 497       | 265         | 0                              | 0           | 0          |
| 3375                           | 1353                             | 54          | Chlq-0.5mM       | 36 | 34             | 30           | ND        | 567         | 0                              | 0           | 0          |
| 3375                           | 1353                             | 54          | Chlq-1mM         | 36 | 29             | 29           | ND        | 579         | 1                              | 1           | 0          |
| 3375                           | 1353                             | 54          | <b>Chlq-20mM</b> | 28 | 17             | 17           | ND        | 220         | 0                              | 0           | 0          |
| 2121                           | 1098                             | 54          | Chlq-0.5mM       | 32 | 28             | 28           | 720       | 149         | 1                              | 1           | 0          |
| 2121                           | 1098                             | 54          | Chlq-1mM         | 31 | 25             | 25           | 314       | 162         | 1                              | 0           | 1          |
| 2121                           | 1098                             | 54          | Chlq-2mM         | 22 | 20             | 20           | 412       | 228         | 1                              | 0           | 1          |
| 6750                           | 1406                             | 54          | Chlq-0.5mM       | 13 | 11             | 11           | 300       | 143         | 1                              | 0           | 1          |
| 3375                           | 1353                             | 24          | Chlq-0.5mM       | 36 | 19             | <u>11</u>    | 262       | 87          | 1                              | 0           | 3          |
| 3587                           | 1737                             | 54          | <b>Chlq-20mM</b> | 20 | 19             | 19           | 500       | 440         | 0                              | 0           | 0          |
| 4214                           | <b>903</b>                       | 24          | Chlq-0.5mM       | 62 | 28             | <u>12</u>    | 459       | 105         | 0                              | 0           | 0          |
| 3375                           | 1353                             | 28          | Chlq-0.5mM       | 15 | 12             | <u>8</u>     | 418       | 330         | 0                              | 0           | 0          |
| 3375                           | 1393                             | <b>5</b>    | Chlq-0.5mM       | 19 | 18             | <u>13</u>    | 766       | 676         | 0                              | 0           | 0          |
| 3375                           | 1393                             | <b>5</b>    | Chlq-0.5mM       | 20 | 19             | <u>10</u>    | 666       | 574         | 0                              | 0           | 0          |
| 3375                           | 1393                             | 24          | Chlq-0.5mM       | 15 | 12             | <u>10</u>    | 500       | 379         | 0                              | 0           | 0          |
| <b>1588</b>                    | 1405                             | 24          | Chlq-0.5mM       | 26 | 24             | <u>18</u>    | 994       | 816         | 0                              | 0           | 0          |
| <b>1125</b>                    | 1393                             | 24          | Chlq-0.5mM       | 26 | 26             | <u>19</u>    | 982       | 809         | 0                              | 0           | 0          |
| <b>502</b>                     | 1393                             | 24          | Chlq-0.5mM       | 26 | 24             | <u>13</u>    | 602       | 457         | 0                              | 0           | 0          |

\*After 24h of injection, surviving females were allowed to lay eggs individually (underlined numbers) or in a single group of survivors (no text formatting). The number of females laying eggs was determined directly from isofemales, or estimated as the number of females alive when eggs first appeared in the group cages.

\*\*The number of females laying knockouts (KO) was 1 when only one KO was produced from group of females or was determined directly from isofemales

**Bold** text indicates conditions tested that did not work at least once and thus were not further tested.

**Supplementary Table 5.** Life history parameters for isofemales injected with Cas9, P2C-Cas9 and P2C-EGFP-Cas9.

| RNP                   | [RNP]<br>ng $\mu\text{L}^{-1}$ | N<br>injected | Survival | %<br>Survival | ♀<br>Laying* | %<br>Laying | Eggs | G <sub>0</sub> WT | G <sub>0</sub> KO |
|-----------------------|--------------------------------|---------------|----------|---------------|--------------|-------------|------|-------------------|-------------------|
| Cas9                  | 2250                           | 25            | 18       | 72%           | 19           | 76%         | 835  | 459               | 0                 |
|                       | 2250                           | 30            | 30       | 100%          | 28           | 93%         | 1339 | 868               | 1                 |
|                       | 2250                           | 28            | 21       | 75%           | 13           | 46%         | nd   | 200               | 0                 |
|                       | 2250                           | 25            | 20       | 80%           | 22           | 88%         | 1179 | 675               | 0                 |
|                       | 2250                           | 30            | 30       | 100%          | 19           | 63%         | 758  | 415               | 0                 |
|                       | Total                          | 138           | 119      | 86%           | 101          | 73%         | 4111 | 2617              | 1                 |
| P2C-<br>Cas9          | 2200                           | 25            | 17       | 68%           | 17           | 68%         | 972  | 645               | 7                 |
|                       | 2200                           | 30            | 30       | 100%          | 23           | 77%         | 1084 | 665               | 0                 |
|                       | 2200                           | 25            | 19       | 76%           | 18           | 72%         | 994  | 531               | 21                |
|                       | 2200                           | 29            | 29       | 100%          | 21           | 72%         | 937  | 521               | 4                 |
|                       | Total                          | 109           | 95       | 87%           | 79           | 72%         | 3987 | 2362              | 32                |
| P2C-<br>EGFP-<br>Cas9 | 2375                           | 27            | 27       | 100%          | 24           | 89%         | 1144 | 795               | 0                 |
|                       | 2375                           | 15            | 15       | 100%          | 14           | 93%         | 638  | 409               | 1                 |
|                       | Total                          | 42            | 42       | 100%          | 38           | 90%         | 1782 | 1204              | 1                 |

Data on each row for the same RNP represents a replicate.

\*Note: some females that appeared to be dead 24 hours PI were not dead and laid eggs.

**Supplementary Table 6.** Gene editing of the maternal allele using several Cas9 RNP at different concentrations and endosomal escape reagents (EER). One trial consisted of 10-40 females.

| Protein               | [Protein]<br>ng $\mu\text{L}^{-1}$ | [sgRNA]<br>ng $\mu\text{L}^{-1}$ | Endosomal<br>Escape<br>Reagent | N<br>Trials | ♀<br>Injected | G0<br>WT | G0<br>KO | #KO/<br>injection<br>EEF (%) | #KO/<br>Surviving<br>G0<br>GEF (%) |
|-----------------------|------------------------------------|----------------------------------|--------------------------------|-------------|---------------|----------|----------|------------------------------|------------------------------------|
| Cas9                  | 1670                               | 639                              | None                           | 1           | 10            | 42       | 0        | 0.0%                         | 0.00%                              |
|                       | 1466-<br>2952                      | 1062-<br>1253                    | Chloroquine<br>0.5-5mM         | 5           | 138           | 2617     | 1        | 0.7%                         | 0.04%                              |
|                       |                                    |                                  | Total                          | 6           | 148           | 2649     | 1        | 0.7%                         | 0.04%                              |
| P2C-<br>Cas9          | 2250                               | 1400                             | Chloroquine<br>0.5 mM          | 5           | 142           | 2850     | 43       | 30%                          | 1.51%                              |
| P2C-<br>EGFP-<br>CAS9 | 1237-<br>3337                      | 1118-<br>1853                    | None/dynasore                  | 6           | 117           | 599      | 0        | 0.0%                         | 0.00%                              |
|                       | 2258-<br>6750                      | 703-<br>1406                     | Chloroquine<br>0.25-10mM       | 25          | 672           | 8156     | 12       | 1.8%                         | 0.15%                              |
|                       | 3375                               | 703                              | Monensin<br>1mM                | 1           | 20            | 405      | 0        | 0.0%                         | 0.00%                              |
|                       | 3375                               | 703                              | Saponin 24 $\mu\text{M}$       | 1           | 20            | 164      | 0        | 0.0%                         | 0.00%                              |
|                       | 3375                               | 703                              | NH <sub>4</sub> Cl 50mM        | 1           | 20            | 265      | 0        | 0.0%                         | 0.00%                              |

**Supplementary Table 7.** Gene editing of the paternal allele using P2C-EGFP-Cas9 RNP at different concentrations and endosomal escape reagents (EER). One trial consisted of 10-40 females.

| [Protein]<br>ng $\mu\text{L}^{-1}$ | [sgRNA]<br>ng $\mu\text{L}^{-1}$ | Endosomal<br>escape strategy | N<br>Trials | ♀<br>injected | Wild<br>type | White | #KO/<br>injection<br>EEF<br>(%) | #KO/<br>Surviving<br>G <sub>0</sub><br>GEF (%) |
|------------------------------------|----------------------------------|------------------------------|-------------|---------------|--------------|-------|---------------------------------|------------------------------------------------|
| 1250                               | 1863                             | None                         | 5           | 73            | 266          | 1     | 1%                              | 0%                                             |
| 3000-<br>3375                      | 1040-<br>1167                    | Chloroquine<br>0.5-1mM       | 4           | 80            | 464          | 0     | 0%                              | 0%                                             |
| 3375                               | 1040                             | Monensin 1mM                 | 1           | 20            | 53           | 1     | 5%                              | 2%                                             |
| 3375                               | 1040                             | Saponin 24 $\mu\text{M}$     | 1           | 20            | 160          | 1     | 5%                              | 1%                                             |
| 3375                               | 1040                             | NH <sub>4</sub> Cl 50mM      | 1           | 20            | 29           | 0     | 0%                              | 0%                                             |

**Supplementary Table 8.** Heritability test of the mutations in the *kmo* site 519. Individual G<sub>0</sub> adults showing a knockout phenotype were mated to white eye adults.

| #<br>Test | G <sub>0</sub> adults |           |        |               | G <sub>1</sub> Offspring (N)* |       |             |
|-----------|-----------------------|-----------|--------|---------------|-------------------------------|-------|-------------|
|           | ID                    | Phenotype | Sex    | # Egg batches | Wild type                     | White | % White eye |
| 1         | Mon-KO8               | Mosaic    | Male   | 1             | 18                            | 17    | 48.57%      |
| 2         | Sap-KO11              | Mosaic    | Male   | 1             | 14                            | 16    | 53.33%      |
| 3         | KO-2021-1.8           | White     | Female | 1             | 0                             | 61    | 100%        |
|           |                       |           |        | 2             | 0                             | 52    | 100%        |
| 4         | KO6-2                 | White     | Male   | 1             | 0                             | 51    | 100%        |
| 5         | KO6-3                 | White     | Female | 1             | 0                             | 23    | 100%        |

\*If the mutations are heritable, these will appear in >75% of G<sub>1</sub> larvae. White eye G<sub>0</sub>, but not mosaics, showed 100% white eye progeny.

## Supplementary Methods

### Plasmid construction and protein expression in S2 cells

*D. melanogaster* cell line S2 (ATCC<sup>®</sup> CRL-1963<sup>™</sup>) was used for protein production. The plasmid pAc5-STABLE1-neo<sup>91</sup> was previously modified in our lab to introduce the exon 1 of DmYP1 containing a secretion peptide signal (DmYPss) creating the vector pAc5-DmYPss-EGFP and also the plasmid pAc5-DmYPss-DmYP1-EGFP (Supplementary Figure 2, sequences of the inserts are available in the Supplementary Notes). For protein expression, the plasmids pAc5-DmYPss-(G4Sx3)-EGFP and pAc5-DmYPss-DmYP1-EGFP was transiently transfected into S2 cells, on 6 well plates, using 2 ml of Schneider's medium (Thermofisher) containing  $3 \times 10^6$  cells per well. Briefly, 2.5  $\mu$ g of plasmid DNA were diluted into 500  $\mu$ L of Opti-MEM<sup>®</sup> I Reduced Serum Medium without serum, added 2.5  $\mu$ L of Plus Reagent to diluted DNA and mixed gently, incubated 5 – 15 min at room temperature. 5  $\mu$ L of Lipofectamine<sup>®</sup> with Plus<sup>™</sup> LTX (ThermoFisher) was added into the above-diluted DNA solution, mixed gently and incubated for 25 minutes at room temperature. 500  $\mu$ L of the DNA-lipofectamine complexes were added directly to each well containing cells and agitated gently by rocking the plate back and forth. Cells were incubated at 25°C for 24–72 h. The production of EGFP alone was used as control for secretion (plasmid pAc5-EGFP). Transfection rates were assessed by scoring the percentage of cells expressing mCherry under fluorescence microscopy. The secreted fusion DmYP1-EGFP protein was collected from medium 72 h post-transfection by spinning down the cell culture at 1000g x 3 min and concentrating the supernatant 100 times (100X) using Centricon plus-70 filter units of 30kD. The concentrated supernatant was used directly for injection or stored at -80C. Additionally, for stable transfection, 10% fetal Bovine serum (FBS) and 2000  $\mu$ g/ml Geneticin<sup>®</sup> G418 sulfate (Thermofisher) were added to the initial medium for transfection, and weekly for selection of transformed cells, once stable, the cells were maintained without G418.

**Identification of a putative receptor-binding region of DmYP1 for *An. gambiae* ovaries.** A deletion analysis of the DmYP1 protein was conducted to identify the smaller region that efficiently transduced cargo into *An. gambiae* ovaries. Different fragments of the protein DmYP1 (Figure 1a) were amplified with primers containing the restriction site SacI and fused to EGFP using the backbone plasmid pAc5-DmYPss-EGFP. The fusion protein containing the fragment of 439 amino acids (DmYP1) was used as a positive control, recombinant EGFP without a targeting ligand was used as a negative control. Five portions of the gene were tested to find the RBR, First, the gene was divided in three equal portions each of approximately 120 amino acids termed P2, P3 and P4, numbered from the NH-terminus to the COOH-terminus respectively. Portion five (P5) included P2 and P3 and portion six (P6) included P3 and P4 (Figure 1a).

All the procedures including cell transfection, protein expression and purification were conducted as described above. Groups of 10-20 females were injected with each protein fragment. Ovaries were dissected 12 and 48 hours post-injection and visualized for EGFP

fluorescence. 50-100 follicles were examined. The experiment was repeated two times. The efficiency of EGFP delivery was estimated as the percentage of oocytes showing EGFP in the yolk granules.

## **Optimization of conditions for maternal gene editing injections**

### **RNP preparation**

RNP was prepared using a molar ratio protein to sgRNA between 1:2-1:3. Variation in the concentrations of RNP and sgRNA, time of injection post-blood feeding and Endosomal escape reagents (EER) were tested. Final RNP concentration ranged between  $500 \text{ ng } \mu\text{L}^{-1}$  to  $6000 \text{ ng } \mu\text{L}^{-1}$ . sgRNA concentration ranged from 700 to  $1853 \text{ ng } \mu\text{L}^{-1}$ , time of injection between 5 to 54 hours PBF. Several EER were tested. Chloroquine was used at different concentrations between 0.25 to 20 mM. Chloroquine was prepared from a stock at 70 mM kept at  $-80 \text{ }^\circ\text{C}$ . After several trails without positive results, we noticed that working solutions of the EER chloroquine were not appropriate for short-term storage. **These solutions should be prepared fresh for each trial, and added to the RNP mix immediately before injections.**

### **Selection of females for outcrossing and injection**

For optimization, wild type (WT) females were outcrossed to white-eye (Wh-Iso8-kmo460) males. To obtain these adults, eggs from both colonies were hatched during the same day and were provided with food until pupation. Pupae were sorted by sex under a dissecting microscope and placed inside cages labeled with the mating type, number and sex of the pupae. The cages containing WT female pupae were observed daily to carefully monitor emergence and remove any male adult that could potentially affect the experiment. One-day old white eye adult males were transferred to the cage with WT females. Mating was allowed during at least 4 days. For injections, females 5-7 days old were fed in the cage. The day of injections females were placed at  $4 \text{ }^\circ\text{C}$  and sorted by feeding status, we also checked that there was no contamination with wild type males or white-eye females in each cage before proceeding with injections.

### **Survival and oviposition of injected females**

After 24h of injection, surviving females were transferred to oviposition containers to lay eggs individually (isofemales) or in a single group of survivors (group). Survival was determined after examining the females after injections, those individuals that did not move, fly or respond to manipulation with forceps were considered dead. Procedures related to determining survival, fecundity and fertility of each treatment are described below.

*Survival and oviposition in groups.* All the females that survived the injections were placed inside a cage containing an oviposition container consisting of a plastic cup with a paper filter soaked in reverse osmosis (RO) water. Sucrose solution (10%) was provided in a cotton ball.

Survival was measured daily, and the day of first egg laying was recorded. On day three after the first egg was laid, surviving females were transferred to a new cage and the dead ones were transferred to microvials and frozen at -80 °C. The paper filter containing eggs was removed and let dry for 12-24 h and the eggs were hatched on 500 ml of RO water supplemented with one or two grounded fish food pellets for the hatching larvae.

*Survival and oviposition of isofemales.* Females were placed on oviposition containers made with 50 ml Falcon® tubes (VWR). A cotton ball soaked on 2 ml of RO water was placed at the bottom of each tube with Whatman filter paper (VWR) placed on top of it. A nylon mesh wrapped with rubber bands was used to cover the tube and a cotton ball soaked on 10% sterile sugar solution was provided on top of each mesh. Survival and oviposition was measured daily after isolating the females. On day three after the first egg was laid, surviving females were transferred to a new oviposition tube and the dead ones were transferred to microvials and frozen at -80 °C. The cotton ball and the paper filter containing eggs were removed, the eggs were dried for 12-24h, then the eggs were placed back in the tube and immersed in 10-15 ml of RO water supplemented with 100 µL of 1% ground fish food slurry prepared in RO water provided as food for the hatching larvae.

*Number of females laying eggs.* The number of females laying eggs, the number of eggs per female, the number of females laying mutants and the number of mutants per female were directly determined from isofemale experiments. In the group cages the number of females laying eggs was estimated as the number of females alive when eggs first appeared, the number of females laying knockouts (KO) was 1 only when 1 KO was produced from the group of females, otherwise it was not determined (ND). The number of mutants per female was not determined unless there was only one mutant from the group of females.

## **Screening**

Larvae hatching was confirmed 24h-48h after soaking the eggs in water, those eggs that did not hatch were dried for 12h-24h and soaked in RO water. 48 hours after hatching was confirmed, larvae were placed on a home-made sifter made with a plastic petri dish which had the bottom removed and replaced with a fine nylon mesh that retained the larvae but not water. The progeny of each isofemale was independently screened for white eye or mosaic larvae, as well as the total progeny of the females that were grouped. The mutants were isolated in tubes labeled with the treatment, day and mutant ID and allowed to become adults. Once finished screening, the wild type larvae were returned to the tubes and allowed to grow to pupae to perform a second screening for white eye or mosaics that were not detected initially. Screening early larvae instead of waiting to screen at the pupal stage allowed us to detect mutants that could die before they reach that stage and thus allowing us to better estimate the gene editing efficiency of ReMOT Control.



**Supplementary Note1:** DNA sequences (5' to 3') for protein expression of fusion proteins DmYP1 and derivatives on S2 cells using the backbone vector pAc5-STABLE1-neo. Highlighted sequence in light blue is DmYP1 exon 1 that contains the secretion signal, grey is the G4Sx3 linker, dark red is DmYP1 or any of its derivatives (P2-to P6 and P2A, P2B or P2C), green is EGFP. Lowercase letters indicate restriction sites used for cloning the fragments or nucleotide additions required to make the protein in-frame.

### pAc5-DmYPss-EGFP

tctagaATGAACCCCATGAGAGTGCTGAGCCTTCTGGCTTGCTTGGCGGTGCGCCGCCTTG  
GCCAAGCCCAATGGCCGTATGGACAACCTCCGTCAACCAGGCATTGAAGCCGTCGCA  
GTGGCTCTCCGGATCCCAGCTGGAGGCCATTCCCGCCCTCGACGATTCACCATTGA  
GCGTCTGGAGAACATGAACCTGGAGCGTGGCGCCGAGCTGCTGCAGCAAGTATACG  
GGCCCgagctcAGGCGCGCCGGAGGAGGCGGCAGCGGTGGTGGAGGAAGCGGTGGAG  
GCGGGAGC**ATGGTGAGCAAGGGCGAGGAGCTGTTACCGGGGTGGTGCCCATCCTG**  
**GTCGAGCTGGACGGCGACGTAAACGGCCACAAGTTCAGCGTGTCCGGCGAGGGCGA**  
**GGGCGATGCCACCTACGGCAAGCTGACCCTGAAGTTCATCTGCACCACCGGCAAGC**  
**TGCCCCTGCCCTGGCCCACCCTCGTGACCACCCTGACCTACGGCGTGCAGTGCTTCA**  
**GCCGCTACCCCGACCACATGAAGCAGCAGACTTCTTCAAGTCCGCCATGCCCGAA**  
**GGTACGTCCAGGAGCGCACCATCTTCTTCAAGGGCGACGGCAACTACAAGACCCG**  
**CGCCGAGGTGAAGTTCGAGGGCGACACCCTGGTGAACCGCATCGAGCTGAAGGGCA**  
**TCGACTTCAAGGAGGACGGCAACATCCTGGGGCACAAGCTGGAGTACA ACTACAAC**  
**AGCCACAACGTCTATATCATGGCCGACAAGCAGAAGAACGGCATCAAGGTGAACCTT**  
**CAAGATCCGCCACAACATCGAGGACGGCAGCGTGCAGCTCGCCGACCACTACCAGC**  
**AGAACACCCCATCGGGCAGCGGCCCGTGCTGCTGCCCGACAACCACTACCTGAGC**  
**ACCCAGTCCGCCCTGAGCAAAGACCCCAACGAGAAGCGCGATCACATGGTCTCTGCT**  
**GGAGTTCGTGACCGCCGCCGGGATCACTCTCGGCATGGACGAGCTGTAC**aagctt

### pAc5-DmYPss-DmYP1-EGFP

tctagaATGAACCCCATGAGAGTGCTGAGCCTTCTGGCTTGCTTGGCGGTGCGCCGCCTTG  
GCCAAGCCCAATGGCCGTATGGACAACCTCCGTCAACCAGGCATTGAAGCCGTCGCA  
GTGGCTCTCCGGATCCCAGCTGGAGGCCATTCCCGCCCTCGACGA<sup>t</sup>TTCACCATTGAG  
CGTCTGGAGAACATGAACCTGGAGCGTGGCGCCGAGCTGCTGCAGCAAGTATACGG  
GCCGgagctc**CACCTGTCGAGATCCACCACAACGTTGAGCCCAACTATGTGCCAGCG**  
**GCATCCAGGTCTATGTGCCAAGCCCAATGGTGACAAGACCGTTGCTCCCCTGAACG**  
**AGATGATCCAGCGCCTGAAGCAGAAGCAGAACTTGGTGAGGATGAGGTGACCATC**  
**ATTGTGACCGGACTGCCCCAGACCAGCGAGACCGTGAAGAAGGCGACCAGGAAGCT**  
**GGTTCAGGCTTACATGCAGCGCTACAATCTGCAGCAGCAGCGCCAGCACGGCAAGA**  
**ACGGCAACCAGGACTACCAGGATCAGAGCAACGAACAGAGGAAGAACCAGAGGAC**  
**CAGCAGCGAGGAGGACTACAGCGAGGAGGTTAAGAACGCCAAGACCCAAAGCGGC**  
**GACATCATTGTGATCGATTTGGGCTCCAAGCTGAACACCTATGAGCGTTATGCCATG**

CTCGACATTGAGAAGACCGGCGCCAAGATCGGCAAGTGGATCGTCCAGATGGTCAA  
CGAGTTGGACATGCCCTTCGATACCATTACCTGATTGGCCAGAATGTGGGTGCCCA  
TGTTGCCGGTGCCGCTGCCAGGAATCACCCGTCTACCGGACACAAGCTGCGCCG  
TGTCACCGGTCTGGATCCCTCCAAGATCGTGGCCAAGAGCAAGAACACCCTGACCG  
GTCTGGCTCGCGGTGATGCTGAATTCGTTGACGCCATCCACACCTCGGTCTACGGCA  
TGGGCACCCCATCCGCTCCGGTGATGTTGACTTCTATCCCAATGGACCTGCCGCCG  
GTGTTCCCGGAGCCAGCAACGTGGTGGAGGCCGCCATGCGTGCCACCCGCTACTTCG  
CCGAGTCCGTGCGTCCCGGAAACGAGAGGAGCTTCCCGCCGTGCCAGCCAACCTCC  
CTGCAGCAGTACAAGCAGAACGATGGATTCGGCAAGCGTGCCTACATGGGCATCGA  
TACCGCTCACGATCTCGAGGGTGACTACATTCGTCAGGTGAACCCCAAGTCTCCTTT  
CGGCCGCAACGCACCCGCCAGAAAGCAGAGCAGCTACCACGGTGTCCACCAGGCGT  
GGAACACCAACCAGGACAGCAAGGACTACCAGgagctcAGGCGCGCCGGAGGAGGCG  
GCAGCGGTGGTGGAGGAAGCGGTGGAGGCCGGGAGC**ATGGTGAGCAAGGGCGAGGA**  
**GCTGTTACCGGGGTGGTGCCATCCTGGTTCGAGCTGGACGGCGACGTAAACGGCC**  
**ACAAGTTCAGCGTGTCCGGCGAGGGCGAGGGCGATGCCACCTACGGCAAGCTGACC**  
**CTGAAGTTCATCTGCACCACCGGCAAGCTGCCCGTGCCCTGGCCACCCCTCGTGACC**  
**ACCCTGACCTACGGCGTGCAGTGCTTCAGCCGCTACCCCGACCACATGAAGCAGCA**  
**CGACTTCTTCAAGTCCGCCATGCCCGAAGGCTACGTCCAGGAGCGCACCATCTTCTT**  
**CAAGGGCGACGGCAACTACAAGACCCGCGCCGAGGTGAAGTTCGAGGGCGACACC**  
**CTGGTGAACCGCATCGAGCTGAAGGGCATCGACTTCAAGGAGGACGGCAACATCCT**  
**GGGGCACAAGCTGGAGTACAACAGCCACAACGTCTATATCATGGCCGACA**  
**AGCAGAAGAACGGCATCAAGGTGAACTTCAAGATCCGCCACAACATCGAGGACGGC**  
**AGCGTGCAGCTCGCCGACCACTACCAGCAGAACACCCCATCGGCGACGGCCCCGT**  
**GCTGCTGCCCGACAACCACTACCTGAGCACCCAGTCCGCCCTGAGCAAAGACCCCA**  
**ACGAGAAGCGCGATCACATGGTCTGCTGGAGTTCGTGACCGCCGCCGGGATCACT**  
**CTCGGCATGGACGAGCTGTAC**aagctt

### pAc5-DmYPss-P2-EGFP

tctaga**ATGAACCCCATGAGAGTGCTGAGCCTTCTGGCTTGCTTGGCGGTTCGCCGCCTTG**  
**GCCAAGCCCAATGGCCGTATGGACAACCTCCGTCAACCAGGCATTGAAGCCGTCGCA**  
**GTGGCTCTCCGGATCCCAGCTGGAGGCCATTCCCGCCCTCGACGA**tTTCACCAT**TGAG**  
**CGTCTGGAGAACATGAACCTGGAGCGTGGCGCCGAGCTGCTGCAGCAAGTATACGG**  
GCCGgagctc**CACCTGTCGAGATCCACCACAACGTTGAGCCCAACTATGTGCCAGCG**  
**GCATCCAGGTCTATGTGCCCAAGCCCAATGGTGACAAGACCGTTGCTCCCCTGAACG**  
**AGATGATCCAGCGCCTGAAGCAGAAGCAGA**ACTTGGTGAGGATGAGGTGACCATC  
ATTGTGACCGGACTGCCCCAGACCAGCGAGACCGTGAAGAAGGCGACCAGGAAGCT  
GGTTCAGGCTTACATGCAGCGCTACAATCTGCAGCAGCAGCGCCAGCACGGCAAGA  
ACGGCAACCAGGACTACCAGGATCAGAGCAACGAACAGAGGAAGAACCAGAGGAC  
CAGCAGCGAGGAGGACTACAGCGAGGAGGTTAAGAAACgagctcAGGCGCGCCGGAGG  
AGGCGGCAGCGGTGGTGGAGGAAGCGGTGGAGGCCGGGAGC**ATGGTGAGCAAGGGC**  
**GAGGAGCTGTTACCGGGGTGGTGCCATCCTGGTTCGAGCTGGACGGCGACGTAAA**

CGGCCACAAGTTCAGCGTGTCGGGCGAGGGCGAGGGCGATGCCACCTACGGCAAGC  
TGACCCTGAAGTTCATCTGCACCACCGGCAAGCTGCCCCTGCCCTGGCCCACCCTCG  
TGACCACCCTGACCTACGGCGTGCAGTGCTTCAGCCGCTACCCCGACCACATGAAGC  
AGCACGACTTCTTCAAGTCCGCCATGCCGAAGGCTACGTCCAGGAGCGCACCATCT  
TCTTCAAGGGCGACGGCAACTACAAGACCCGCGCCGAGGTGAAGTTCGAGGGCGAC  
ACCCTGGTGAACCGCATCGAGCTGAAGGGCATCGACTTCAAGGAGGACGGCAACAT  
CCTGGGGCACAAGCTGGAGTACAACAGCCACAACGTCTATATCATGGCCG  
ACAAGCAGAAGAACGGCATCAAGGTGAACTTCAAGATCCGCCACAACATCGAGGAC  
GGCAGCGTGCAGCTCGCCGACCACTACCAGCAGAACACCCCATCGGGCAGCGCCC  
CGTGCTGCTGCCGACAACCACTACCTGAGCACCCAGTCCGCCCTGAGCAAAGACC  
CCAACGAGAAGCGCGATCACATGGTCCTGCTGGAGTTCGTGACCGCCCGGGATC  
ACTCTCGGCATGGACGAGCTGTACaagctt

### pAc5-DmYPss-P3-EGFP

tctagaATGAACCCCATGAGAGTGCTGAGCCTTCTGGCTTGCTTGGCGGTGCGCCGCTTG  
GCCAAGCCCAATGGCCGTATGGACAACCTCCGTCAACAGGCATTGAAGCCGTCGCA  
GTGGCTCTCCGGATCCCAGCTGGAGGCCATTCCCGCCCTCGACGAATTCACCATTGAG  
CGTCTGGAGAACATGAACCTGGAGCGTGGCGCCGAGCTGCTGCAGCAAGTATACGG  
GCCGagctcGCCAAGACCCAAAGCGGGCAGCATCATTGTGATCGATTTGGGCTCCAAGC  
TGAACACCTATGAGCGTTATGCCATGCTCGACATTGAGAAGACCGGGCGCCAAGATC  
GGCAAGTGGATCGTCCAGATGGTCAACGAGTTGGACATGCCCTTCGATACCATTCA  
CTGATTGGCCAGAATGTGGGTGCCCATGTTGCCGGTGCCGCTGCCCAGGAATTCACC  
CGTCTCACCGGACACAAGCTGCGCCGTGTCACCGGTCTGGATCCCTCCAAGATCGTG  
GCCAAGAGCAAGAACCCCTGACCGGTCTGGCTCGCGGTGATGCTGAATTCGTTGA  
CGCCATCCACACCTCGGTCTACGGCATGGGCgagctcAGGCGCGCCGGAGGAGGCGGC  
AGCGGTGGTGGAGGAAGCGGTGGAGGCGGGAGCATGGTGAGCAAGGGCGAGGAGC  
TGTTACCGGGGTGGTGCCATCCTGGTCGAGCTGGACGGCGACGTAAACGGCCAC  
AAGTTCAGCGTGTCCGGCGAGGGCGAGGGCGATGCCACCTACGGCAAGCTGACCCT  
GAAGTTCATCTGCACCACCGGCAAGCTGCCCCTGCCCTGGCCCACCCTCGTGACCAC  
CCTGACCTACGGCGTGCAGTGCTTCAGCCGCTACCCCGACCACATGAAGCAGCACG  
ACTTCTTCAAGTCCGCCATGCCGAAGGCTACGTCCAGGAGCGCACCATCTTCTTCA  
AGGGCGACGGCAACTACAAGACCCGCGCCGAGGTGAAGTTCGAGGGGCGACACCCTG  
GTGAACCGCATCGAGCTGAAGGGCATCGACTTCAAGGAGGACGGCAACATCCTGGG  
GCACAAGCTGGAGTACAACAGCCACAACGTCTATATCATGGCCGACAAGC  
AGAAGAACGGCATCAAGGTGAACTTCAAGATCCGCCACAACATCGAGGACGGCAGC  
GTGCAGCTCGCCGACCACTACCAGCAGAACACCCCATCGGGCAGCGGCCCGTGCT  
GCTGCCGACAACCACTACCTGAGCACCCAGTCCGCCCTGAGCAAAGACCCCAACG  
AGAAGCGCGATCACATGGTCCTGCTGGAGTTCGTGACCGCCCGGGATCACTCTCG  
GCATGGACGAGCTGTACaagctt

**pAc5-DmYPss-P4-EGFP**

tctagaATGAACCCCATGAGAGTGCTGAGCCTTCTGGCTTGCTTGCGGTCGCCGCCTTG  
GCCAAGCCCAATGGCCGTATGGACAACCTCCGTCAACCAGGCATTGAAGCCGTCGCA  
GTGGCTCTCCGGATCCCAGCTGGAGGCCATTCCCGCCCTCGACGAiTTCACCATTGAG  
CGTCTGGAGAACATGAACCTGGAGCGTGGCGCCGAGCTGCTGCAGCAAGTATACGG  
GCCgagctcACCCCATCCGCTCCGGTGATGTTGACTTCTATCCCAATGGACCTGCCG  
CCGGTGTTCCCGGAGCCAGCAACGTGGTGGAGGCCGCCATGCGTGCCACCCGCTAC  
TTCGCCGAGTCCGTGCGTCCCGGAAACGAGAGGAGCTTCCCGCCGTGCCAGCCAA  
CTCCCTGCAGCAGTACAAGCAGAACGATGGATTCCGGCAAGCGTGCCTACATGGGCA  
TCGATACCGCTCACGATCTCGAGGGTGACTACATTCTGCAGGTGAACCCCAAGTCTC  
CTTTCGGCCCGCAACGCACCCGCCAGAAGCAGAGCAGCTACCACGGTGTCCACCAG  
GCGTGGAACACCAACCAGGACAGCAAGGACTACCAGgagctcAGGCGCGCCGGAGGA  
GGCGGCAGCGGTGGTGGAGGAAGCGGTGGAGGCGGGAGC**ATGGTGAGCAAGGGCG**  
**AGGAGCTGTTACCGGGGTGGTGCCATCCTGGTCGAGCTGGACGGCGACGTAAC**  
**GGCACAAGTTCAGCGTGTCCGGCGAGGGCGAGGGCGATGCCACCTACGGCAAGCT**  
**GACCCTGAAGTTCATCTGCACCACCGCAAGCTGCCCGTGCCCTGGCCACCCTCGT**  
**GACCACCCTGACCTACGGCGTGCAGTGCTTCAGCCGCTACCCCGACCACATGAAGC**  
**AGCACGACTTCTCAAGTCCGCCATGCCCGAAGGCTACGTCCAGGAGCGCACCATCT**  
**TCTCAAGGGCGACGGCAACTACAAGACCCGCGCCGAGGTGAAGTTCGAGGGCGAC**  
**ACCCTGGTGAACCGCATCGAGCTGAAGGGCATCGACTTCAAGGAGGACGGCAACAT**  
**CCTGGGGCACAAGCTGGAGTACAACAGCCACAACGTCTATATCATGGCCG**  
**ACAAGCAGAAGAACGGCATCAAGGTGAACCTCAAGATCCGCCACAACATCGAGGAC**  
**GGCAGCGTGCAGCTCGCCGACCACTACCAGCAGAACACCCCATCGGCGACGGCCC**  
**CGTGCTGCTGCCGACAACCACTACCTGAGCACCCAGTCCGCCCTGAGCAAAGACC**  
**CCAACGAGAAGCGCGATCACATGGTCCTGCTGGAGTTCGTGACCGCCGCCGGGATC**  
**ACTCTCGGCATGGACGAGCTGTAC**aagctt

**pAc5-DmYPss-P5-EGFP**

tctagaATGAACCCCATGAGAGTGCTGAGCCTTCTGGCTTGCTTGCGGTCGCCGCCTTG  
GCCAAGCCCAATGGCCGTATGGACAACCTCCGTCAACCAGGCATTGAAGCCGTCGCA  
GTGGCTCTCCGGATCCCAGCTGGAGGCCATTCCCGCCCTCGACGAiTTCACCATTGAG  
CGTCTGGAGAACATGAACCTGGAGCGTGGCGCCGAGCTGCTGCAGCAAGTATACGG  
GCCgagctcCACCTGTCGAGATCCACCACAACGTTGAGCCCAACTATGTGCCAGCG  
GCATCCAGGTCTATGTGCCAAGCCCAATGGTGACAAGACCGTTGCTCCCTGAACG  
AGATGATCCAGCGCCTGAAGCAGAAGCAGAACCTTGGTGAGGATGAGGTGACCATC  
ATTGTGACCGGACTGCCCCAGACCAGCGAGACCGTGAAGAAGGCGACCAGGAAGCT  
GGTTCAGGCTTACATGCAGCGCTACAATCTGCAGCAGCAGCGCCAGCACGGCAAGA  
ACGGCAACCAGGACTACCAGGATCAGAGCAACGAACAGAGGAAGAACCAGAGGAC  
CAGCAGCGAGGAGGACTACAGCGAGGAGGTTAAGAACGCCAAGACCCAAAGCGGC  
GACATCATTGTGATCGATTTGGGCTCCAAGCTGAACACCTATGAGCGTTATGCCATG  
CTCGACATTGAGAAGACCGGCGCCAAGATCGGCAAGTGGATCGTCCAGATGGTCAA

CGAGTTGGACATGCCCTTCGATACCATTACCTGATTGGCCAGAATGTGGGTGCCA  
TGTTGCCGGTGCCGCTGCCAGGAATTCACCCGTCTCACCGGACACAAGCTGCGCC  
TGTCACCGGTCTGGATCCCTCCAAGATCGTGGCCAAGAGCAAGAACACCCTGACCG  
GTCTGGCTCGCGGTGATGCTGAATTCGTTGACGCCATCCACACCTCGGTCTACGGCA  
TGGGCgagctcAGGCGCGCCGGAGGAGGCGGCAGCGGTGGTGGAGGAAGCGGTGGAG  
GCCGGAGC ATGGTGAGCAAGGGCGAGGAGCTGTTACCGGGGTGGTGCCATCCTG  
GTCGAGCTGGACGGCGACGTAAACGGCCACAAGTTCAGCGTGTCCGGCGAGGGCGA  
GGGCGATGCCACCTACGGCAAGCTGACCCTGAAGTTCATCTGCACCACCGGCAAGC  
TGCCCGTGCCCTGGCCCACCCTCGTGACCACCCTGACCTACGGCGTGCAGTGCTTCA  
GCCGCTACCCCGACCACATGAAGCAGCAGACTTCTTCAAGTCCGCCATGCCCGAA  
GGCTACGTCCAGGAGCGCACCATCTTCTTCAAGGGCGACGGCAACTACAAGACCCG  
CGCCGAGGTGAAGTTCGAGGGCGACACCCTGGTGAACCGCATCGAGCTGAAGGGCA  
TCGACTTCAAGGAGGACGGCAACATCCTGGGGCACAAGCTGGAGTACAACACTACAAC  
AGCCACAACGTCTATATCATGGCCGACAAGCAGAAGAACGGCATCAAGGTGAACCT  
CAAGATCCGCCACAACATCGAGGACGGCAGCGTGCAGCTCGCCGACCACTACCAGC  
AGAACACCCCATCGGGCAGCGCCCCGTGCTGCTGCCCGACAACCACTACCTGAGC  
ACCCAGTCCGCCCTGAGCAAAGACCCCAACGAGAAGCGCGATCACATGGTCCTGCT  
GGAGTTCGTGACCGCCGCCGGGATCACTCTCGGCATGGACGAGCTGTACaagctt

#### pAc5-DmYPss-P6-EGFP

tctaga ATGAACCCCATGAGAGTGCTGAGCCTTCTGGCTTGCTTGGCGGTGCGCCGCTTG  
GCCAAGCCCAATGGCCGTATGGACAACCTCCGTCAACCAGGCATTGAAGCCGTCGCA  
GTGGCTCTCCGGATCCCAGCTGGAGGCCATTCCCGCCCTCGACGAATTCACCATTGAG  
CGTCTGGAGAACATGAACCTGGAGCGTGGCGCCGAGCTGCTGCAGCAAGTATACGG  
GCCgagctcGCCAAGACCCAAAGCGGGCGACATCATTGTGATCGATTTGGGCTCCAAGC  
TGAACACCTATGAGCGTTATGCCATGCTCGACATTGAGAAGACCGGGCGCCAAGATC  
GGCAAGTGGATCGTCCAGATGGTCAACGAGTTGGACATGCCCTTCGATACCATTAC  
CTGATTGGCCAGAATGTGGGTGCCCATGTTGCCGGTGCCGCTGCCAGGAATTCACC  
CGTCTCACCGGACACAAGCTGCGCCGTGTACCAGGTCTGGATCCCTCCAAGATCGTG  
GCCAAGAGCAAGAACACCCTGACCGGTCTGGCTCGCGGTGATGCTGAATTCGTTGA  
CGCCATCCACACCTCGGTCTACGGCATGGGCACCCCATCCGCTCCGGTGATGTTGA  
CTTCTATCCCAATGGACCTGCCGCCGGTGTCCCGGAGGCCAGCAACGTGGTGGAGGC  
CGCCATGCGTGCCACCCGCTACTTCGCCGAGTCCGTGCGTCCCGGAAACGAGAGGA  
GCTTCCCCGCCGTGCCAGCCAACCTCCCTGCAGCAGTACAAGCAGAACGATGGATTC  
GGCAAGCGTGCCTACATGGGCATCGATACCGCTCACGATCTCGAGGGTGACTACATT  
CTGCAGGTGAACCCCAAGTCTCCTTTCGGCCGCAACGCACCCGCCAGAAGCAGAG  
CAGCTACCACGGTGTCCACCAGGCGTGGAAACACCAACCAGGACAGCAAGGACTACC  
AGgagctcAGGCGCGCCGGAGGAGGCGGCAGCGGTGGTGGAGGAAGCGGTGGAGGCG  
GGAGC ATGGTGAGCAAGGGCGAGGAGCTGTTACCGGGGTGGTGCCATCCTGGTC  
GAGCTGGACGGCGACGTAAACGGCCACAAGTTCAGCGTGTCCGGCGAGGGCGAGG  
CGGATGCCACCTACGGCAAGCTGACCCTGAAGTTCATCTGCACCACCGGCAAGCTG

CCCGTGCCCTGGCCCACCCTCGTGACCACCCTGACCTACGGCGTGCAGTGCTTCAGC  
CGCTACCCCGACCACATGAAGCAGCACGACTTCTTCAAGTCCGCCATGCCCGAAGG  
CTACGTCCAGGAGCGCACCATCTTCTTCAAGGGCGACGGCAACTACAAGACCCGCG  
CCGAGGTGAAGTTCGAGGGCGACACCCTGGTGAACCGCATCGAGCTGAAGGGCATC  
GACTTCAAGGAGGACGGCAACATCCTGGGGCACAAGCTGGAGTACAACACTACAACAG  
CCACAACGTCTATATCATGGCCGACAAGCAGAAGAACGGCATCAAGGTGAACTTCA  
AGATCCGCCACAACATCGAGGACGGCAGCGTGCAGCTCGCCGACCACTACCAGCAG  
AACACCCCATCGGCGACGGCCCCGTGCTGCTGCCGACAACCACTACCTGAGCAC  
CCAGTCCGCCCTGAGCAAAGACCCCAACGAGAAGCGCGATCACATGGTCCTGCTGG  
AGTTCGTGACCGCCGCGGGATCACTCTCGGCATGGACGAGCTGTACaagctt

### pAc5-DmYPss-P2A-EGFP

tctagaATGAACCCCATGAGAGTGCTGAGCCTTCTGGCTTGCTTGGCGGTGCGCCGCCTTG  
GCCAAGCCCAATGGCCGTATGGACAACCTCCGTCAACCAGGCATTGAAGCCGTCGCA  
GTGGCTCTCCGGATCCCAGCTGGAGGCCATTCCCGCCCTCGACGAiTTCACCATTGAG  
CGTCTGGAGAACATGAACCTGGAGCGTGGCGCCGAGCTGCTGCAGCAAGTATACGG  
GCCGagctcCACCTGTCGAGATCCACCACAACGTTGAGCCCAACTATGTGCCAGCG  
GCATCCAGGTCTATGTGCCAAGCCCAATGGTGACAAGACCGTTGCTCCCCTGAACG  
AGATGATCCAGCGCCTagagctcAGGCGCGCCGGAGGAGGCGGCAGCGGTGGTGGAGG  
AAGCGGTGGAGGCGGGAGC ATGGTGAGCAAGGGCGAGGAGCTGTTACCCGGGGTG  
GTGCCATCCTGGTTCGAGCTGGACGGCGACGTAAACGGCCACAAGTTCAGCGTGTG  
CGGCGAGGGCGAGGGCGATGCCACCTACGGCAAGCTGACCCTGAAGTTCATCTGCA  
CCACCGCAAGCTGCCCCTGCCCTGGCCACCCTCGTGACCACCCTGACCTACGGCG  
TGCAGTGCTTCAGCCGCTACCCCGACCACATGAAGCAGCACGACTTCTTCAAGTCCG  
CCATGCCCGAAGGCTACGTCCAGGAGCGCACCATCTTCTTCAAGGGCGACGGCAAC  
TACAAGACCCGCGCCGAGGTGAAGTTCGAGGGCGACACCCTGGTGAACCGCATCGA  
GCTGAAGGGCATCGACTTCAAGGAGGACGGCAACATCCTGGGGCACAAGCTGGAGT  
ACAACACTACAACAGCCACAACGTCTATATCATGGCCGACAAGCAGAAGAACGGCATC  
AAGGTGAACTTCAAGATCCGCCACAACATCGAGGACGGCAGCGTGCAGCTCGCCGA  
CCACTACCAGCAGAACACCCCATCGGCGACGGCCCCGTGCTGCTGCCGACAACC  
ACTACCTGAGCACCCAGTCCGCCCTGAGCAAAGACCCCAACGAGAAGCGCGATCAC  
ATGGTCCTGCTGGAGTTCGTGACCGCCGCGGGATCACTCTCGGCATGGACGAGCTG  
TACaagctt

### pAc5-DmYPss-P2B-EGFP

tctagaATGAACCCCATGAGAGTGCTGAGCCTTCTGGCTTGCTTGGCGGTGCGCCGCCTTG  
GCCAAGCCCAATGGCCGTATGGACAACCTCCGTCAACCAGGCATTGAAGCCGTCGCA  
GTGGCTCTCCGGATCCCAGCTGGAGGCCATTCCCGCCCTCGACGAiTTCACCATTGAG  
CGTCTGGAGAACATGAACCTGGAGCGTGGCGCCGAGCTGCTGCAGCAAGTATACGG  
GCCGagctcAAGCAGAAGCAGAACTTTGGTGAGGATGAGGTGACCATCATTGTGACC

GGACTGCCCCAGACCAGCGAGACCGTGAAGAAGGCGACCAGGAAGCTGGTTCAGG  
CTTACATGCAGCGCTACA<sup>gggagctc</sup>AGGCGCGCCGGAGGAGGCGGCAGCGGTGGTGG  
AGGAAGCGGTGGAGGCGGGAGC<sup>ATGGTGAGCAAGGGCGAGGAGCTGTTACCCGGG</sup>  
<sup>GTGGTGCCCATCCTGGTTCGAGCTGGACGGCGACGTAAACGGCCACAAGTTCAGCGT</sup>  
<sup>GTCCGGCGAGGGCGAGGGCGATGCCACCTACGGCAAGCTGACCCTGAAGTTCATCT</sup>  
<sup>GCACCACCGGCAAGCTGCCCCTGGCCACCCTCGTGACCACCCTGACCTACG</sup>  
<sup>GCGTGCAGTGCTTCAGCCGCTACCCCGACCACATGAAGCAGCACGACTTCTTCAAGT</sup>  
<sup>CCGCCATGCCC GAAGGCTACGTCCAGGAGCGCACCATCTTCTTCAAGGGCGACGGC</sup>  
<sup>AACTACAAGACCCGCGCCGAGGTGAAGTTCGAGGGCGACACCCTGGTGAACCGCAT</sup>  
<sup>CGAGCTGAAGGGCATCGACTTCAAGGAGGACGGCAACATCCTGGGGCACAAGCTGG</sup>  
<sup>AGTACA ACTACAACAGCCACAACGTCTATATCATGGCCGACAAGCAGAAGAACGGC</sup>  
<sup>ATCAAGGTGAACTTCAAGATCCGCCACAACATCGAGGACGGCAGCGTGCAGCTCGC</sup>  
<sup>CGACCACTACCAGCAGAACACCCCATCGGCGACGGCCCCGTGCTGCTGCCCGACA</sup>  
<sup>ACCACTACCTGAGCACCCAGTCCGCCCTGAGCAAAGACCCCAACGAGAAGCGCGAT</sup>  
<sup>CACATGGTCTGCTGGAGTTCGTGACC GCCCGGGATCACTCTCGGCATGGACGAG</sup>  
<sup>CTGTAC</sup><sup>aagctt</sup>

#### pAc5-DmYPss-P2C-EGFP

tctaga<sup>ATGAACCCCATGAGAGTGCTGAGCCTTCTGGCTTGCTTGGCGGTCGCCGCCTTG</sup>  
<sup>GCCAAGCCCAATGGCCGTATGGACA ACTCCGTCAACCAGGCATTGAAGCCGTCGCA</sup>  
<sup>GTGGCTCTCCGATCCCAGCTGGAGGCCATTCCCGCCCTCGACGA</sup><sup>t</sup><sup>TTCACCATTGAG</sup>  
<sup>CGTCTGGAGAACATGAACCTGGAGCGTGGCGCCGAGCTGCTGCAGCAAGTATA</sup><sup>CGG</sup>  
<sup>GCCC</sup><sup>gagctc</sup><sup>AATCTGCAGCAGCAGCGCCAGCACGGCAAGAACGGCAACCAGGACTAC</sup>  
<sup>CAGGATCAGAGCAACGAACAGAGGAAGAACCAGAGGACCAGCAGCGAGGAGGACT</sup>  
<sup>ACAGCGAGGAGGTTAAGAAC</sup><sup>gagctc</sup><sup>AGGCGCGCCGGAGGAGGCGGCAGCGGTGGTG</sup>  
<sup>GAGGAAGCGGTGGAGGCGGGAGC</sup><sup>ATGGTGAGCAAGGGCGAGGAGCTGTTACCCGG</sup>  
<sup>GGTGGTGCCCATCCTGGTTCGAGCTGGACGGCGACGTAAACGGCCACAAGTTCAGCG</sup>  
<sup>TGTCCGGCGAGGGCGAGGGCGATGCCACCTACGGCAAGCTGACCCTGAAGTTCATC</sup>  
<sup>TGCACCACCGGCAAGCTGCCCCTGGCCACCCTCGTGACCACCCTGACCTAC</sup>  
<sup>GGCGTGCAGTGCTTCAGCCGCTACCCCGACCACATGAAGCAGCACGACTTCTTCAAG</sup>  
<sup>TCCGCCATGCCC GAAGGCTACGTCCAGGAGCGCACCATCTTCTTCAAGGGCGACGG</sup>  
<sup>CAACTACAAGACCCGCGCCGAGGTGAAGTTCGAGGGCGACACCCTGGTGAACCGCA</sup>  
<sup>TCGAGCTGAAGGGCATCGACTTCAAGGAGGACGGCAACATCCTGGGGCACAAGCTG</sup>  
<sup>GAGTACA ACTACAACAGCCACAACGTCTATATCATGGCCGACAAGCAGAAGAACGG</sup>  
<sup>CATCAAGGTGAACTTCAAGATCCGCCACAACATCGAGGACGGCAGCGTGCAGCTCG</sup>  
<sup>CCGACCACTACCAGCAGAACACCCCATCGGCGACGGCCCCGTGCTGCTGCCCGAC</sup>  
<sup>AACCACTACCTGAGCACCCAGTCCGCCCTGAGCAAAGACCCCAACGAGAAGCGCGA</sup>  
<sup>TCACATGGTCTGCTGGAGTTCGTGACC GCCCGGGATCACTCTCGGCATGGACGA</sup>  
<sup>GCTGTAC</sup><sup>aagctt</sup>

**Supplementary Note 2:** DNA sequences for expression of fusion proteins P2C-EGFP, P2C-Cas9 and P2C-EGFP-Cas9 in the plasmid pET28a. Highlighted sequence in yellow is the 6xHis-Tag in the vector, dark red is for P2C, green is for EGFP and teal is for Cas9.

### pET28a-P2C-EGFP

CATCATCATCATCATCACAGCAGCGGCCTGGTGCCGCGCGGCAGCCATATGGCTAGC  
ATGACTGGTGGACAGCAAATGGGTCGCGGATCCAATCTGCAGCAGCAGCGCCAGCA  
CGGCAAGAACGGCAACCAGGACTACCAGGATCAGAGCAACGAACAGAGGAAGAAC  
CAGAGGACCAGCAGCGAGGAGGACTACAGCGAGGAGGTTAAGAACgagctcAGGCGC  
GCCGGAGGAGGCGGCAGCGGTGGTGGAGGAAGCGGTGGAGGCGGGAGCATGGTGA  
GCAAGGGCGAGGAGCTGTTACCGGGGTGGTGCCATCCTGGTTCGAGCTGGACGGC  
GACGTAAACGGCCACAAGTTCAGCGTGTCCGGCGAGGGCGAGGGCGATGCCACCTA  
CGGCAAGCTGACCCTGAAGTTCATCTGCACCACCGGCAAGCTGCCCCTGCCCTGGCC  
CACCTCGTGACCACCCTGACCTACGGCGTGCAGTGTTCAGCCGCTACCCCGACCA  
CATGAAGCAGCACGACTTCTTCAAGTCCGCCATGCCCGAAGGCTACGTCCAGGAGC  
GCACCATCTTCTCAAGGGCGACGGCAACTACAAGACCCGCGCCGAGGTGAAGTTC  
GAGGGCGACACCCTGGTGAACCGCATCGAGCTGAAGGGCATCGACTTCAAGGAGGA  
CGGCAACATCCTGGGGCACAAGCTGGAGTACAACACTACAACAGCCACAACGTCTATA  
TCATGGCCGACAAGCAGAAGAACGGCATCAAGGTGAACTTCAAGATCCGCCACAAC  
ATCGAGGACGGCAGCGTGCAGCTCGCCGACCACTACCAGCAGAACACCCCCATCGG  
CGACGGCCCCGTGCTGCTGCCCGACAACCACTACCTGAGCACCCAGTCCGCCCTGAG  
CAAAGACCCCAACGAGAAGCGCGATCACATGGTCTGCTGGAGTTCGTGACCGCCG  
CCGGGATCACTCTCGGCATGGACGAGCTGTACggattc

### pET28a-P2C-Cas9

CATCATCATCATCATCACAGCAGCGGCCTGGTGCCGCGCGGCAGCCATATGGCTAGC  
ATGACTGGTGGACAGCAAATGGGTCGCGGATCCAATCTGCAGCAGCAGCGCCAGCA  
CGGCAAGAACGGCAACCAGGACTACCAGGATCAGAGCAACGAACAGAGGAAGAAC  
CAGAGGACCAGCAGCGAGGAGGACTACAGCGAGGAGGTTAAGAACgagctcCGTCTGA  
CAAGCTTGCGGCCGCATGGACAAGAAGTACAGCATCGGCCTGGACATCGGTACCAA  
CAGCGTGGGCTGGGCCGTGATCACCGACGAGTACAAGGTGCCAGCAAGAAGTCA  
AGGTGCTGGGCAACACCGACCGCCACAGCATCAAGAAGAACCTGATCGGCGCCCTG  
CTGTTTCGACAGCGGCAGACCGCCGAGGCCACCCGCCTGAAGCGCACCGCCCGCCG  
CCGCTACACCCGCCGCAAGAACCGCATCTGCTACCTGCAGGAGATCTTCAGCAACG  
AGATGGCCAAGGTGGACGACAGCTTCTTCCACCGCCTGGAGGAGAGCTTCTGGTG  
GAGGAGGACAAGAAGCACGAGCGCCACCCCATCTTCGGCAACATCGTGGACGAGGT  
GGCCTACCACGAGAAGTACCCACCATCTACCACCTGCGCAAGAAGCTGGTGGACA  
GCACCGACAAGGCCGACCTGCGCCTGATCTACCTGGCCCTGGCCACATGATCAAGT  
TCCGCGGCCACTTCTGATCGAGGGCGACCTGAACCCCGACAACAGCGACGTGGAC  
AAGCTGTTTCATCCAGCTGGTGCAGACCTACAACCAGCTGTTTCGAGGAGAACCCCATC



AACGCCAGCGGCGTGGACGCCAAGGCCATCCTGAGCGCCCGCCTGAGCAAGAGCCG  
CCGCCTGGAGAACCTGATCGCCAGCTGCCCGGCGAGAAGAAGAACGGCCTGTTCC  
GCAACCTGATCGCCCTGAGCCTGGGCCTGACCCCAACTTCAAGAGCAACTTCGACC  
TGGCCGAGGACGCCAAGCTGCAGCTGAGCAAGGACACCTACGACGACGACCTGGAC  
AACCTGCTGGCCAGATCGGCGACCAGTACGCCGACCTGTTCTTGCCGCCAAGAA  
CCTGAGCGACGCCATCCTGCTGAGCGACATCCTGCGCGTGAACACCGAGATCACCA  
AGGCCCCCCTGAGCGCCAGCATGATCAAGCGCTACGACGAGCACCACCAGGACCTG  
ACCCTGCTGAAGGCCCTGGTGCGCCAGCAGCTGCCCGAGAAGTACAAGGAGATCTT  
CTTCGACCAGAGCAAGAACGGCTACGCCGGCTACATCGACGGCGGGCACCAGCCAGG  
AGGAGTTCTACAAGTTCATCAAGCCATCCTGGAGAAGATGGACGGCACCGAGGAG  
CTGCTGGTGAAGCTGAACCGCGAGGACCTGCTGCGCAAGCAGCGCACCTTCGACAA  
CGGCAGCATCCCCACCAGATCCACCTGGGGCAGCTGCACGCCATCCTGCGCCGCC  
AGGAGGACTTCTACCCCTTCTGAAGGACAACCGCGAGAAGATCGAGAAGATCCTG  
ACCTTCCGCATCCCCTACTACGTGGGCCCCCTGGCCCGCGGCAACAGCCGCTTCGCC  
TGGATGACCCGCAAGAGCGAGGAGACCATCACCCCTGGA ACTTCGAGGAGGTGGT  
GGACAAGGGCGCCAGCGCCAGAGCTTCATCGAGCGCATGACCAACTTCGACAAGA  
ACCTGCCAACGAGAAGGTGCTGCCAAGCACAGCCTGCTGTACGAGTACTTCACC  
GTGTACAACGAGCTGACCAAGGTGAAGTACGTGACCGAGGGCATGCGCAAGCCCGC  
CTTCTGAGCGGCGAGCAGAAGAAGGCCATCGTGGACCTGCTGTTCAAGACCAACC  
GCAAGGTGACCGTGAAGCAGCTGAAGGAGGACTACTTCAAGAAGATCGAGTGCTTC  
GACAGCGTGGAGATCAGCGGCGTGGAGGACCGCTTCAACGCCAGCCTGGGCACCTA  
CCACGACCTGCTGAAGATCATCAAGGACAAGGACTTCTGGACAACGAGGAGAACG  
AGGACATCCTGGAGGACATCGTGCTGACCCTGACCCTGTTTCGAGGACCGCGAGATG  
ATCGAGGAGCGCCTGAAGACCTACGCCACCTGTTCGACGACAAGGTGATGAAGCA  
GCTGAAGCGCCGCGCTACACCGGCTGGGGCCCGCTGAGCCGCAAGCTTATCAACG  
GCATCCGCGACAAGCAGAGCGGCAAGACCATCCTGGACTTCTGAAGAGCGACGGC  
TTCGCCAACCGCAACTTCATGCAGCTGATCCACGACGACAGCCTGACCTTCAAGGAG  
GACATCCAGAAGGCCAGGTGAGCGGCCAGGGCGACAGCCTGCACGAGCACATCGC  
CAACCTGGCCGGCAGCCCCGCCATCAAGAAGGGCATCCTGCAGACCGTGAAGGTGG  
TGGACGAGCTGGTGAAGGTGATGGGCGCCACAAGCCCGAGAACATCGTGATCGAG  
ATGGCCCGCGAGAACCAGACCACCAGAAGGGCCAGAAGAACAGCCGCGAGCGCA  
TGAAGCGCATCGAGGAGGGCATCAAGGAGCTGGGCAGCCAGATCCTGAAGGAGCA  
CCCCGTGGAGAACACCCAGCTGCAGAACGAGAAGCTGTACCTGTACTACCTGCAGA  
ACGGCCGCGACATGTACGTGGACCAGGAGCTGGACATCAACCGCCTGAGCGACTAC  
GACGTGGACCACATCGTGCCCCAGAGCTTCTGAAGGACGACAGCATCGACAACAA  
GGTGCTGACCCGCGAGCGACAAGAACCGCGGCAAGAGCGACAACGTGCCACGCGAG  
GAGGTGGTGAAGAAGATGAAGA ACTACTGGCGCCAGCTGCTGAACGCCAAGCTGAT  
CACCCAGCGCAAGTTCGACAACCTGACCAAGGCCGAGCGCGGGCCTGAGCGAGC  
TGGACAAGGCCGGCTTCATCAAGCGCCAGCTGGTGGAGACCCGCCAGATCACCAAG  
CACGTGGCCAGATCCTGGACAGCCGCATGAACACCAAGTACGACGAGAACGACAA  
GCTGATCCGCGAGGTGAAGGTGATCACCCCTGAAGAGCAAGCTGGT GAGCGACTTCC  
GCAAGGACTTCCAGTTCTACAAGGTGCGCGAGATCAACA ACTACCACCACGCCAC  
GACGCCTACCTGAACGCCGTGGTGGGCACCGCCCTGATCAAGAAGTACCCCAAGCT

GGAGAGCGAGTTCGTGTACGGCGACTACAAGGTGTACGACGTGCGCAAGATGATCG  
CCAAGAGCGAGCAGGAGATCGGCAAGGCCACCGCCAAGTACTTCTTCTACAGCAAC  
ATCATGAACTTCTTCAAGACCGAGATCACCTGGCCAACGGCGAGATCCGCAAGCG  
CCCCCTGATCGAGACCAACGGCGAGACCGGCGAGATCGTGTGGGACAAGGGCCGCG  
ACTTCGCCACCGTGCGCAAGGTGCTGAGCATGCCCCAGGTGAACATCGTGAAGAAG  
ACCGAGGTGCAGACCGGCGGCTTCAGCAAGGAGAGCATCCTGCCCAAGCGCAACAG  
CGACAAGCTGATCGCCCGCAAGAAGGACTGGGACCCCAAGAAGTACGGCGGCTTCG  
ACAGCCCCACCGTGGCCTACAGCGTGTGGTGGTGGCCAAGGTGGAGAAGGGCAAG  
AGCAAGAAGCTGAAGAGCGTGAAGGAGCTGCTGGGCATCACCATCATGGAGCGCAG  
CAGCTTCGAGAAGAACCCCATCGACTTCTGGAGGCCAAGGGCTACAAGGAGGTGA  
AGAAGGACCTGATCATCAAGCTGCCCAAGTACAGCCTGTTCGAGCTGGAGAACGGC  
CGCAAGCGCATGCTGGCCAGCGCCGGCGAGCTGCAGAAGGGCAACGAGCTGGCCCT  
GCCAGCAAGTACGTGAACTTCTGTACCTGGCCAGCCACTACGAGAAGCTGAAGG  
GCAGCCCCGAGGACAACGAGCAGAAGCAGCTGTTTCGTGGAGCAGCACAAGCACTAC  
CTGGACGAGATCATCGAGCAGATCAGCGAGTTCAGCAAGCGCGTGATCCTGGCCGA  
CGCCAACCTGGACAAGGTGCTGAGCGCCTACAACAAGCACCGCGACAAGCCCATCC  
GCGAGCAGGCCGAGAACATCATCCACCTGTTACCCTGACCAACCTGGGCGCCCCC  
GCCGCTTCAAGTACTTCGACACCACCATCGACCGCAAGCGCTACACCAGCACCAA  
GGAGGTGCTGGACGCCACCCTGATCCACCAGAGCATCACCGGTCTGTACGAGACCC  
GCATCGACCTGAGCCAGCTGGGCGGGCAGCGGCGGCTCCGGACCTCCAAAGAAAAAG  
AGAAAAGTATACCCCTACGACGTGCCCGACTACGCCTGTAA

**pET28a-P2C-EGFP-Cas9**

CATCATCATCATCATCAGCAGCGGCCTGGTGCCGCGCGGCAGCCATATGGCTAGC  
ATGACTGGTGGACAGCAAATGGGTGCGCGATCCAATCTGCAGCAGCAGCGCCAGCA  
CGGCAAGAACGGCAACCAGGACTACCAGGATCAGAGCAACGAACAGAGGAAGAAC  
CAGAGGACCAGCAGCGAGGAGGACTACAGCGAGGAGGTTAAGAAGgagctcAGGCGC  
GCCGGAGGAGGCGGCAGCGGTGGTGGAGGAAGCGGTGGAGGCGGGAGCATGGGTGA  
GCAAGGGCGAGGAGCTGTTACCAGGGGTGGTGCCATCCTGGTTCGAGCTGGACGGC  
GACGTAAACGGCCACAAGTTCAGCGTGTCCGGCGAGGGCGAGGGCGATGCCACCTA  
CGGCAAGCTGACCCTGAAGTTCATCTGCACCACCGGCAAGCTGCCCGTGCCCTGGCC  
CACCTCGTGACCACCCTGACCTACGGCGTGCAGTGCTTCAGCCGCTACCCCGACCA  
CATGAAGCAGCACGACTTCTTCAAGTCCGCCATGCCCGAAGGCTACGTCCAGGAGC  
GCACCATCTTCTTCAAGGGCGACGGCAACTACAAGACCCGCGCCGAGGTGAAGTTC  
GAGGGCGACACCCTGGTGAACCGCATCGAGCTGAAGGGCATCGACTTCAAGGAGGA  
CGGCAACATCCTGGGGCACAAGCTGGAGTACAACACTACAACAGCCACAACGTCTATA  
TCATGGCCGACAAGCAGAAGAACGGCATCAAGGTGAACCTCAAGATCCGCCACAAC  
ATCGAGGACGGCAGCGTGCAGCTCGCCGACCACTACCAGCAGAACACCCCCATCGG  
CGACGGCCCCGTGCTGCTGCCCGACAACCACTACCTGAGCACCCAGTCCGCCCTGAG  
CAAAGACCCCAACGAGAAGCGCGATCACATGGTCCTGCTGGAGTTCGTGACCGCCG  
CCGGGATCACTCTCGGCATGGACGAGCTGTACGGATCCGAATTCgagctcCGTCGACAA

GCTTGCGGCCGCgagctcCGTCGACAAGCTTGCGGCCGCATGGACAAGAAGTACAGCA  
TCGGCCTGGACATCGGTACCAACAGCGTGGGCTGGGCCGTGATCACCGACGAGTAC  
AAGGTGCCAGCAAGAAGTTCAAGGTGCTGGGCAACACCGACCGCCACAGCATCAA  
GAAGAACCTGATCGGCGCCCTGCTGTTTCGACAGCGGCGAGACCGCCGAGGCCACCC  
GCCTGAAGCGCACCGCCCGCCGCGCTACACCCGCCGCAAGAACCGCATCTGCTAC  
CTGCAGGAGATCTTCAGCAACGAGATGGCCAAGGTGGACGACAGCTTCTCCACCG  
CCTGGAGGAGAGCTTCCTGGTGGAGGAGGACAAGAAGCACGAGCGCCACCCCATCT  
TCGGCAACATCGTGGACGAGGTGGCCTACCACGAGAAGTACCCACCATCTACCAC  
CTGCGCAAGAAGCTGGTGGACAGCACCGACAAGGCCGACCTGCGCCTGATCTACCT  
GGCCCTGGCCACATGATCAAGTTCGCGGCCACTTCCTGATCGAGGGCGACCTGAA  
CCCCGACAACAGCGACGTGGACAAGCTGTTTCATCCAGCTGGTGCAGACCTACAACC  
AGCTGTTTCGAGGAGAACCCCATCAACGCCAGCGGCGTGGACGCCAAGGCCATCCTG  
AGCGCCCGCCTGAGCAAGAGCCGCCGCTGGAGAACCTGATCGCCAGCTGCCCGG  
CGAGAAGAAGAACGGCCTGTTTCGGCAACCTGATCGCCCTGAGCCTGGGCCTGACCC  
CCAACTTCAAGAGCAACTTCGACCTGGCCGAGGACGCCAAGCTGCAGCTGAGCAAG  
GACACCTACGACGACGACCTGGACAACCTGCTGGCCAGATCGGCGACCAGTACGC  
CGACCTGTTCTGGCCGCAAGAACCTGAGCGACGCCATCCTGCTGAGCGACATCCT  
GCGCGTGAACACCGAGATCACCAAGGCCCCCTGAGCGCCAGCATGATCAAGCGCT  
ACGACGAGCACCACCAGGACCTGACCCTGCTGAAGGCCCTGGTGCGCCAGCAGCTG  
CCCGAGAAGTACAAGGAGATCTTCTTCGACCAGAGCAAGAACGGCTACGCCGGCTA  
CATCGACGGCGGCCAGCCAGGAGGAGTTCTACAAGTTCATCAAGCCATCCTGG  
AGAAGATGGACGGCACCGAGGAGCTGCTGGTGAAGCTGAACCGCGAGGACCTGCTG  
CGCAAGCAGCGCACCTTCGACAACGGCAGCATCCCCACCAGATCCACCTGGGCGA  
GCTGCACGCCATCCTGCGCCGCCAGGAGGACTTCTACCCCTTCCTGAAGGACAACCG  
CGAGAAGATCGAGAAGATCCTGACCTTCGCGATCCCTACTACGTGGGCCCCCTGGC  
CCGCGGCAACAGCCGCTTCGCCTGGATGACCCGCAAGAGCGAGGAGACCATCACCC  
CCTGGAACCTTCGAGGAGGTGGTGGACAAGGGCGCCAGCGCCAGAGCTTCATCGAG  
CGCATGACCAACTTCGACAAGAACCTGCCCAACGAGAAGGTGCTGCCCAAGCACAG  
CCTGCTGTACGAGTACTTCACCGTGTACAACGAGCTGACCAAGGTGAAGTACGTGAC  
CGAGGGCATGCGCAAGCCCGCTTCCTGAGCGGCGAGCAGAAGAAGGCCATCGTGG  
ACCTGCTGTTCAAGACCAACCGCAAGGTGACCGTGAAGCAGCTGAAGGAGGACTAC  
TTCAAGAAGATCGAGTGCTTCGACAGCGTGGAGATCAGCGGCGTGGAGGACCGCTT  
CAACGCCAGCCTGGGCACCTACCACGACCTGCTGAAGATCATCAAGGACAAGGACT  
TCCTGGACAACGAGGAGAACGAGGACATCCTGGAGGACATCGTGCTGACCCTGACC  
CTGTTTCGAGGACCGCGAGATGATCGAGGAGCGCCTGAAGACCTACGCCACCTGTT  
CGACGACAAGGTGATGAAGCAGCTGAAGCGCCGCCGCTACACCGGCTGGGGCCGCC  
TGAGCCGCAAGCTTATCAACGGCATCCGCGACAAGCAGAGCGGCAAGACCATCCTG  
GACTTCCTGAAGAGCGACGGCTTCGCCAACCGCAACTTCATGCAGCTGATCCACGAC  
GACAGCCTGACCTTCAAGGAGGACATCCAGAAGGCCAGGTGAGCGGCCAGGGCG  
ACAGCCTGCACGAGCACATCGCCAACCTGGCCGGCAGCCCCGCCATCAAGAAGGGC  
ATCCTGCAGACCGTGAAGGTGGTGGACGAGCTGGTGAAGGTGATGGGCCGCCACAA  
GCCCGAGAACATCGTGATCGAGATGGCCCGCGAGAACCAGACCACCCAGAAGGGCC  
AGAAGAACAGCCGCGAGCGCATGAAGCGCATCGAGGAGGGCATCAAGGAGCTGGG

CAGCCAGATCCTGAAGGAGCACCCCGTGGAGAACACCCAGCTGCAGAACGAGAAG  
CTGTACCTGTACTACCTGCAGAACGGCCGCGACATGTACGTGGACCAGGAGCTGGA  
CATCAACCGCCTGAGCGACTACGACGTGGACCACATCGTGCCCCAGAGCTTCTGA  
AGGACGACAGCATCGACAACAAGGTGCTGACCCGCAGCGACAAGAACCGCGGCAA  
GAGCGACAACGTGCCAGCGAGGAGGTGGTGAAGAAGATGAAGAACTACTGGCGC  
CAGCTGCTGAACGCCAAGCTGATCACCCAGCGCAAGTTCGACAACCTGACCAAGGC  
CGAGCGCGGGCGGCTGAGCGAGCTGGACAAGGCCGGCTTCATCAAGCGCCAGCTGG  
TGGAGACCCGCCAGATCACCAAGCACGTGGCCAGATCCTGGACAGCCGCATGAAC  
ACCAAGTACGACGAGAACGACAAGCTGATCCGCGAGGTGAAGGTGATCACCTGAA  
GAGCAAGCTGGTGAGCGACTTCCGCAAGGACTTCCAGTTCTACAAGGTGCGCGAGA  
TCAACAACCTACCACCACGCCACGACGCCTACCTGAACGCCGTGGTGGGCACCGCC  
CTGATCAAGAAGTACCCCAAGCTGGAGAGCGAGTTCGTGTACGGCGACTACAAGGT  
GTACGACGTGCGCAAGATGATCGCCAAGAGCGAGCAGGAGATCGGCAAGGCCACC  
GCCAAGTACTTCTTCTACAGCAACATCATGAACTTCTCAAGACCGAGATCACCTG  
GCCAACGGCGAGATCCGCAAGCGCCCCCTGATCGAGACCAACGGCGAGACCGGCGA  
GATCGTGTGGGACAAGGGCCGCGACTTCGCCACCGTGCGCAAGGTGCTGAGCATGC  
CCCAGGTGAACATCGTGAAGAAGACCGAGGTGCAGACCGGCGGCTTCAGCAAGGA  
GAGCATCCTGCCAAGCGCAACAGCGACAAGCTGATCGCCCGCAAGAAGGACTGGG  
ACCCCAAGAAGTACGGCGGCTTCGACAGCCCCACCGTGGCCTACAGCGTGCTGGTG  
GTGGCCAAGGTGGAGAAGGGCAAGAGCAAGAAGCTGAAGAGCGTGAAGGAGCTGC  
TGGGCATCACCATCATGGAGCGCAGCAGCTTCGAGAAGAACCCCATCGACTTCTG  
GAGGCCAAGGGCTACAAGGAGGTGAAGAAGGACCTGATCATCAAGCTGCCCAAGTA  
CAGCCTGTTCGAGCTGGAGAACGGCCGCAAGCGCATGCTGGCCAGCGCCGGCGAGC  
TGCAGAAGGGCAACGAGCTGGCCCTGCCAGCAAGTACGTGAACTTCTGTACCTG  
GCCAGCCACTACGAGAAGCTGAAGGGCAGCCCCGAGGACAACGAGCAGAAGCAGC  
TGTTTCGTGGAGCAGCACAAGCACTACCTGGACGAGATCATCGAGCAGATCAGCGAG  
TTCAGCAAGCGCGTGATCCTGGCCGACGCCAACCTGGACAAGGTGCTGAGCGCCTA  
CAACAAGCACCGCGACAAGCCCATCCGCGAGCAGGCCGAGAACATCATCCACCTGT  
TCACCCTGACCAACCTGGGGCGCCCCGCGCCTTCAAGTACTTCGACACCACCATCG  
ACCGCAAGCGCTACACCAGCACC AAGGAGGTGCTGGACGCCACCCTGATCCACCAG  
AGCATCACCGGTCTGTACGAGACCCGCATCGACCTGAGCCAGCTGGGCGGCGACGG  
CGGCTCCGGACCTCCAAAGAAAAGAGAAAAGTATACCCCTACGACGTGCCCGACT  
ACGCCTGTAA
